# Supplementary material for: Self-organized patchiness in asthma as a prelude to catastrophic shifts
Source: Springer Nature journal article supplement (doi:10.1038/nature03490), 2005-03-16
Supplement: 41586_2005_BFnature03490_MOESM5_ESM.pdf [file 41586_2005_BFnature03490_MOESM5_ESM.pdf]

**Before Deep Inspiration**

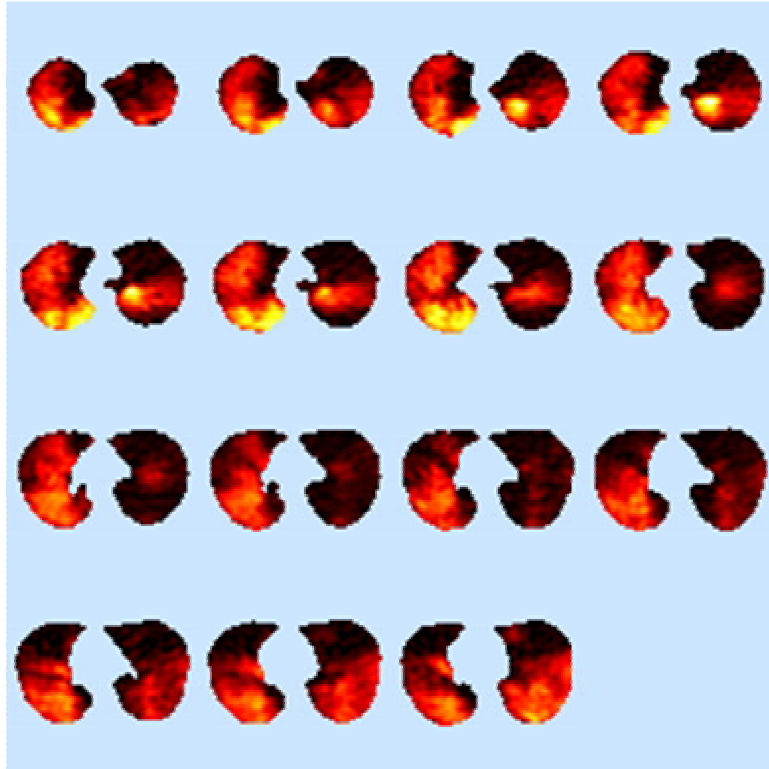

**After Deep Inspiration**

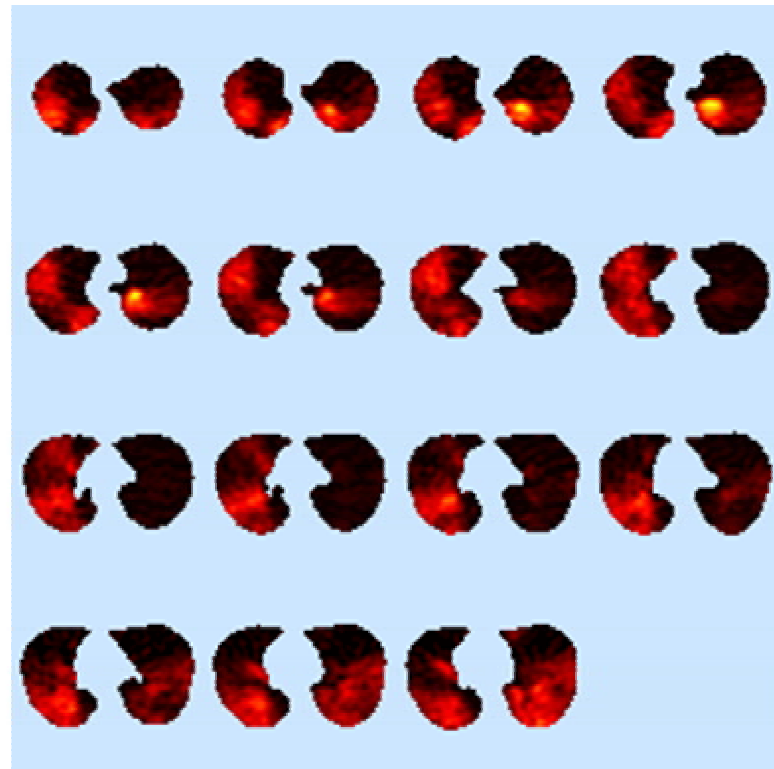

**S5 Supplementary Figure** Full set of residual tracer PET images at end of washout from the bronchoconstricted asthmatic subject shown in Fig. 1 of the paper. Note the large ventilation defects with high residual tracer (left). At the end of the washout period the subject is asked to inhale deeply three times before imaging is continued for an additional period (right). Note that tracer removal by these deep inhalations is enhanced from certain parts of the defects and not from others.
