# Supplementary material for: Self-organized patchiness in asthma as a prelude to catastrophic shifts
Source: Springer Nature journal article supplement (doi:10.1038/nature03490), 2005-03-16
Supplement: 41586_2005_BFnature03490_MOESM7_ESM.pdf [file 41586_2005_BFnature03490_MOESM7_ESM.pdf]

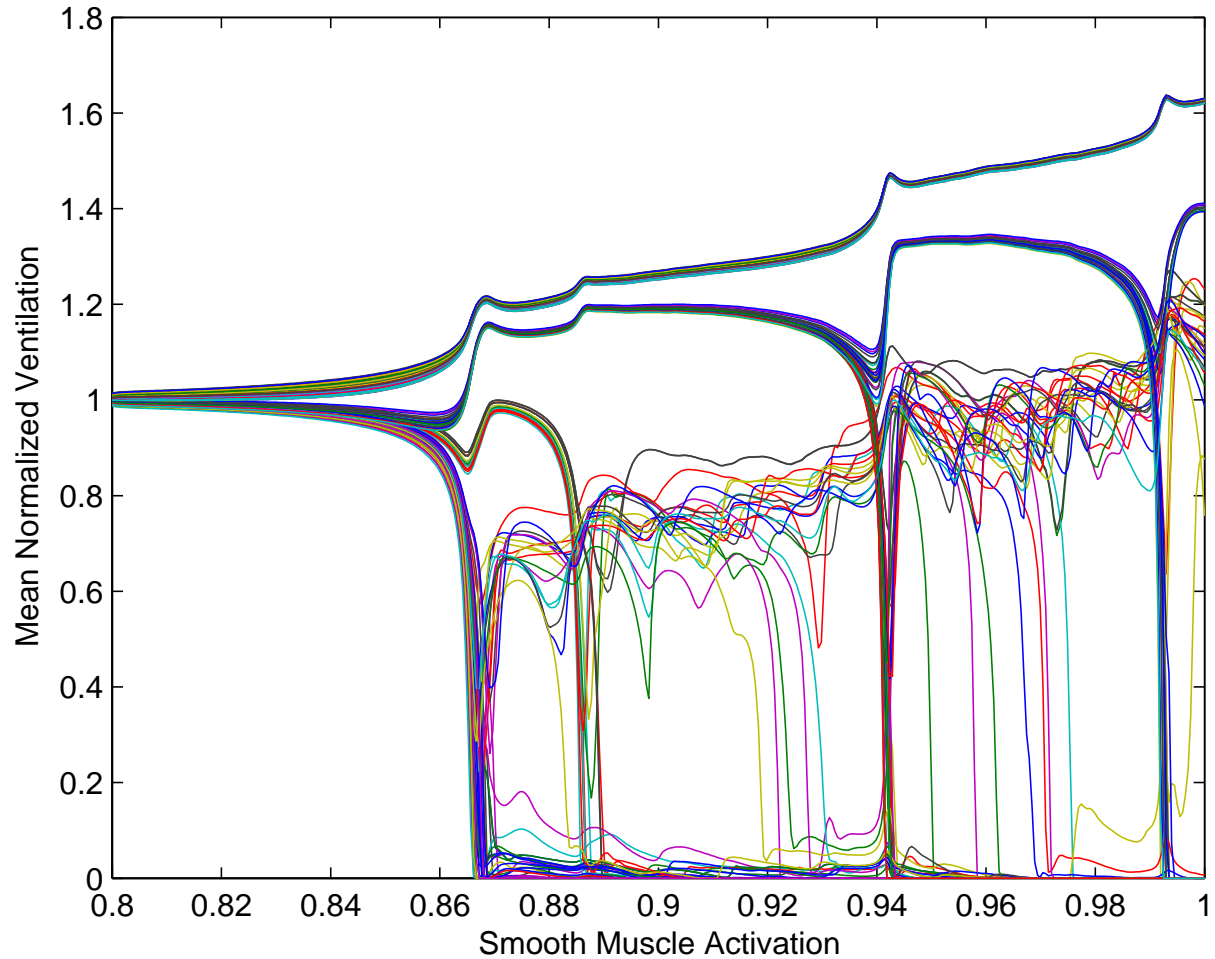

**S7 Supplementary Figure** Complex dynamics of a random sample of 256 terminal units within the model during the simulation displayed in the Suppl. Video S6 as a function of smooth muscle activation level. Note the initial bifurcation at smooth muscle activation around 0.8 where a fraction of spatially correlated units (located in the left side of the lung model) begin to receive higher ventilation while the rest of the terminal units ventilation falls. As smooth muscle activation continues to increase, the terminal units losing ventilation get separated into distinct ventilation states in a series of additional bifurcations. With each of those bifurcations large groups of units catastrophically move towards virtual closure, shifting ventilation towards units remaining open and further increasing their ventilation. Each bifurcation is linked to a catastrophic increase in cluster size in the Suppl. Video S6.
